# Supplementary material for: The Impact of Bedbug (Cimex spp.) Bites on Self-Rated Health and Average Hours of Sleep per Day: A Cross-Sectional Study among Hong Kong Bedbug Victims
Source: MDPI journal article supplement (doi:10.3390/insects12111027), 2021-11-14
Supplement: s1 [file s1]

Multicollinearity diagnostics for adjusted logistic regression for dichotomised self-rated health regressed against fitted variables.

| VIF,<br>r                                           | Bedbug infestation |                    |                    | Physical appearance |                    |                    | Spending money on medication or doctor consultation |                    |                    | No. bites in past month |                    |                    | Time of bites     |                  | Age               |                    |                    | Education level                  |                        | Monthly household income |                    |                     |                     |
|-----------------------------------------------------|--------------------|--------------------|--------------------|---------------------|--------------------|--------------------|-----------------------------------------------------|--------------------|--------------------|-------------------------|--------------------|--------------------|-------------------|------------------|-------------------|--------------------|--------------------|----------------------------------|------------------------|--------------------------|--------------------|---------------------|---------------------|
|                                                     | Someti<br>mes      | Often              | Very<br>often      | Slight              | Moderate           | Severe             | Slight                                              | Moderate           | Severe             | 1-4                     | 5-10               | >10                | Irregularly       | Female           | 0-24              | 25-44              | 45-64              | Primary<br>education<br>or below | Secondary<br>education | <HKD1<br>0,000           | HKD1000-<br>30,000 | HKD30001-<br>50,000 | HKD50001-<br>80,000 |
| Bedbug infestation                                  | Someti<br>mes      | 1.2,<br>-0.163***  | 1.24,<br>-0.169*** | 1.58,<br>0.115*     | 1.58,<br>0.013     | 1.58,<br>-0.128**  | 1.57,<br>0.12*                                      | 1.53,<br>0.084     | 1.58,<br>-0.165*** | 1.57,<br>0.109*         | 1.58,<br>0.027     | 1.57,<br>-0.103*   | 1.57,<br>0.021    | 1.57,<br>-0.065  | 1.57,<br>-0.009   | 1.57,<br>0.096*    | 1.54,<br>-0.068    | 1.58,<br>0.013                   | 1.58,<br>0.035         | 1.58,<br>-0.05           | 1.58,<br>0.035     | 1.58,<br>-0.004     | 1.58,<br>-0.016     |
|                                                     | Often              | 1.51,<br>-0.163*** | 1.33,<br>-0.17***  | 1.99,<br>-0.026     | 1.98,<br>0.117*    | 1.99,<br>0.066     | 1.97,<br>0.069                                      | 1.9,<br>0.078      | 1.92,<br>0.086     | 1.97,<br>-0.116*        | 1.92,<br>0.229***  | 1.93,<br>0.043     | 1.95,<br>0.038    | 1.98,<br>-0.023  | 1.93,<br>-0.037   | 1.91,<br>-0.007    | 1.86,<br>-0.146*** | 1.96,<br>0.14***                 | 1.99,<br>0.001         | 1.95,<br>0.188***        | 1.96,<br>0.037     | 1.97,<br>-0.062     | 1.99,<br>-0.085*    |
|                                                     | Very<br>often      | 1.9,<br>-0.169***  | 1.62,<br>-0.17***  | 2.42,<br>-0.023     | 2.41,<br>0.134**   | 2.4,<br>0.296***   | 2.42,<br>-0.183***                                  | 2.33,<br>0.169***  | 2.31,<br>0.357***  | 2.35,<br>-0.107*        | 2.36,<br>-0.086    | 2.18,<br>0.426***  | 2.39,<br>0.026    | 2.42,<br>0.046   | 2.38,<br>-0.112** | 2.38,<br>-0.032    | 2.38,<br>0.004     | 2.42,<br>0.244***                | 2.42,<br>0.045         | 2.41,<br>0.094*          | 2.4,<br>0.173***   | 2.41,<br>-0.078*    | 2.42,<br>-0.149***  |
| Physical appearance                                 | Slight             | 2,<br>0.115*       | 2.01,<br>-0.026    | 2.01,<br>-0.023     | 1.31,<br>-0.319*** | 1.52,<br>-0.214*** | 1.82,<br>0.3***                                     | 1.83,<br>-0.01     | 1.82,<br>-0.008    | 1.94,<br>0.114*         | 1.89,<br>0.072     | 1.89,<br>0.058     | 2,<br>0.132**     | 1.96,<br>0.119*  | 1.99,<br>0.03     | 1.99,<br>0.05      | 1.99,<br>-0.032    | 2.01,<br>-0.017                  | 2,<br>-0.033           | 1.98,<br>-0.018          | 1.98,<br>-0.009    | 1.97,<br>0.123*     | 2,<br>-0.012        |
|                                                     | Moderate           | 2.22,<br>0.013     | 2.22,<br>0.117*    | 2.22,<br>0.134**    | 1.46,<br>-0.319*** | 1.61,<br>-0.205*** | 2.12,<br>-0.049                                     | 1.8,<br>0.415***   | 2.01,<br>-0.014    | 2.19,<br>-0.067         | 2.11,<br>0.09      | 2.1,<br>0.188***   | 2.23,<br>0.064    | 2.21,<br>0.056   | 2.19,<br>-0.004   | 2.2,<br>0.049      | 2.21,<br>-0.063    | 2.23,<br>0.011                   | 2.22,<br>-0.014        | 2.2,<br>0.103*           | 2.22,<br>0.028     | 2.23,<br>-0.062     | 2.23,<br>-0.06      |
|                                                     | Severe             | 2.1,<br>-0.128**   | 2.1,<br>0.066      | 2.08,<br>0.296***   | 1.59,<br>-0.214*** | 1.52,<br>-0.205*** | 2.04,<br>-0.118*                                    | 1.95,<br>-0.027    | 1.63,<br>0.502***  | 2.08,<br>-0.114*        | 2.03,<br>0.05      | 2.02,<br>0.233***  | 2.1,<br>0.034     | 2.1,<br>-0.11*   | 2.08,<br>-0.021   | 2.09,<br>-0.011    | 2.1,<br>-0.103*    | 2.1,<br>0.172***                 | 2.1,<br>-0.015         | 2.09,<br>0.051           | 2.09,<br>0.096*    | 2.09,<br>-0.049     | 2.1,<br>-0.084      |
| Spending money on medication or doctor consultation | Slight             | 1.86,<br>0.12*     | 1.86,<br>0.069     | 1.87,<br>-0.183***  | 1.7,<br>0.3***     | 1.78,<br>-0.049    | 1.82,<br>-0.118*                                    | 1.34,<br>-0.299*** | 1.5,<br>-0.217***  | 1.7,<br>0.193***        | 1.75,<br>0.073     | 1.75,<br>0.009     | 1.87,<br>0.094    | 1.87,<br>0.001   | 1.87,<br>-0.022   | 1.88,<br>0.069     | 1.87,<br>-0.041    | 1.87,<br>0.015                   | 1.88,<br>-0.017        | 1.88,<br>0.031           | 1.88,<br>-0.04     | 1.87,<br>0.043      | 1.87,<br>0.046      |
|                                                     | Moderate           | 2.17,<br>0.084     | 2.15,<br>0.078     | 2.16,<br>0.169***   | 2.05,<br>-0.01     | 1.82,<br>0.415***  | 2.09,<br>-0.027                                     | 1.61,<br>-0.299*** | 1.59,<br>-0.224*** | 2.22,<br>-0.069         | 2.21,<br>0.091     | 2.2,<br>0.168***   | 2.21,<br>0.147**  | 2.25,<br>0.037   | 2.25,<br>-0.086   | 2.25,<br>0.082     | 2.25,<br>-0.035    | 2.25,<br>-0.013                  | 2.25,<br>-0.002        | 2.24,<br>0.052           | 2.24,<br>0.02      | 2.25,<br>-0.016     | 2.25,<br>-0.072     |
|                                                     | Severe             | 2.3,<br>-0.165***  | 2.23,<br>0.086     | 2.2,<br>0.357***    | 2.09,<br>-0.008    | 2.09,<br>-0.014    | 1.79,<br>0.502***                                   | 1.85,<br>-0.217*** | 1.63,<br>-0.224*** | 2.29,<br>-0.115*        | 2.28,<br>0.051     | 2.28,<br>0.249***  | 2.31,<br>0.024    | 2.29,<br>-0.103* | 2.3,<br>-0.054    | 2.31,<br>-0.072    | 2.31,<br>-0.055    | 2.29,<br>0.233***                | 2.31,<br>-0.02         | 2.3,<br>0.057            | 2.31,<br>0.098*    | 2.31,<br>-0.046     | 2.31,<br>-0.092     |
| No. bites in past month                             | 1-4                | 2.16,<br>0.109*    | 2.16,<br>-0.116*   | 2.11,<br>-0.107*    | 2.1,<br>0.114*     | 2.13,<br>-0.067    | 2.15,<br>-0.114*                                    | 1.98,<br>0.193***  | 2.15,<br>-0.069    | 2.16,<br>-0.115*        | 1.36,<br>-0.286*** | 1.28,<br>-0.397*** | 2.15,<br>0.02     | 2.17,<br>-0.061  | 2.17,<br>0.072    | 2.18,<br>0.044     | 2.18,<br>0.1*      | 2.17,<br>-0.229***               | 2.18,<br>0.033         | 2.17,<br>-0.106*         | 2.17,<br>0         | 2.18,<br>0.049      | 2.17,<br>0.089      |
|                                                     | 5-10               | 2.5,<br>0.027      | 2.42,<br>0.229***  | 2.44,<br>-0.086     | 2.36,<br>0.072     | 2.38,<br>0.09      | 2.42,<br>0.05                                       | 2.34,<br>0.073     | 2.46,<br>0.091     | 2.48,<br>0.051          | 1.57,<br>-0.286*** | 1.33,<br>-0.35***  | 2.45,<br>0.136**  | 2.51,<br>-0.032  | 2.49,<br>-0.006   | 2.48,<br>0.027     | 2.42,<br>-0.155**  | 2.5,<br>-0.04                    | 2.51,<br>0.024         | 2.49,<br>-0.053          | 2.51,<br>0.075     | 2.5,<br>-0.01       | 2.5,<br>-0.074      |
|                                                     | >10                | 3.39,<br>-0.103*   | 3.31,<br>0.043     | 3.07,<br>0.426***   | 3.21,<br>0.058     | 3.21,<br>0.188***  | 3.28,<br>0.233***                                   | 3.18,<br>0.009     | 3.34,<br>0.168***  | 3.37,<br>0.249***       | 2,<br>-0.397***    | 1.81,<br>-0.35***  | 3.36,<br>0.09     | 3.41,<br>0.059   | 3.41,<br>-0.071   | 3.4,<br>0.023      | 3.41,<br>-0.151**  | 3.36,<br>0.353***                | 3.41,<br>-0.065        | 3.41,<br>0.232***        | 3.4,<br>0.046      | 3.41,<br>-0.074     | 3.41,<br>-0.121*    |
| Time of bites                                       | Irregularly        | 1.18,<br>0.021     | 1.16,<br>0.038     | 1.17,<br>0.026      | 1.18,<br>0.132**   | 1.18,<br>0.064     | 1.18,<br>0.034                                      | 1.17,<br>0.094     | 1.18,<br>0.147**   | 1.17,<br>0.024          | 1.16,<br>0.136**   | 1.17,<br>0.09      | 1.16,<br>-0.122*  | 1.18,<br>-0.002  | 1.17,<br>-0.047   | 1.17,<br>-0.097*   | 1.18,<br>0.098*    | 1.18,<br>0.022                   | 1.17,<br>0.133**       | 1.17,<br>0.056           | 1.18,<br>-0.041    | 1.18,<br>-0.103*    |                     |
|                                                     | Female             | 1.12,<br>-0.065    | 1.13,<br>-0.023    | 1.13,<br>0.046      | 1.1,<br>0.119*     | 1.12,<br>0.056     | 1.13,<br>-0.11*                                     | 1.13,<br>0.001     | 1.13,<br>0.037     | 1.12,<br>-0.103*        | 1.13,<br>-0.061    | 1.13,<br>-0.032    | 1.11,<br>-0.122*  | 1.13,<br>0.059   | 1.13,<br>-0.002   | 1.13,<br>0.054     | 1.13,<br>-0.055    | 1.12,<br>-0.002                  | 1.13,<br>-0.013        | 1.12,<br>-0.073          | 1.13,<br>0.035     | 1.13,<br>-0.017     | 1.13,<br>-0.03      |
| Age                                                 | 0-24               | 2.9,<br>-0.009     | 2.83,<br>-0.037    | 2.87,<br>-0.112**   | 2.89,<br>0.03      | 2.87,<br>-0.004    | 2.9,<br>-0.021                                      | 2.91,<br>-0.022    | 2.9,<br>-0.086     | 2.91,<br>-0.054         | 2.91,<br>0.072     | 2.89,<br>-0.006    | 2.92,<br>-0.071   | 2.91,<br>-0.002  | 2.92,<br>0.054    | 1.33,<br>-0.331*** | 1.36,<br>-0.349*** | 2.25,<br>-0.158***               | 2.87,<br>-0.114**      | 2.9,<br>-0.115**         | 2.92,<br>0.043     | 2.88,<br>0.096*     | 2.91,<br>-0.03      |
|                                                     | 25-44              | 3.56,<br>0.096*    | 3.45,<br>-0.007    | 3.52,<br>-0.032     | 3.55,<br>0.05      | 3.54,<br>0.049     | 3.57,<br>-0.011                                     | 3.58,<br>0.069     | 3.58,<br>0.082     | 3.58,<br>-0.072         | 3.58,<br>0.044     | 3.55,<br>0.027     | 3.57,<br>0.023    | 3.53,<br>-0.047  | 3.57,<br>-0.055   | 1.64,<br>-0.331*** | 1.32,<br>-0.441*** | 2.65,<br>-0.202***               | 3.58,<br>0.039         | 3.53,<br>-0.157***       | 3.58,<br>0.037     | 3.57,<br>0.062      | 3.58,<br>0.074      |
|                                                     | 45-64              | 3.73,<br>-0.068    | 3.6,<br>-0.146***  | 3.77,<br>0.004      | 3.81,<br>-0.032    | 3.8,<br>-0.063     | 3.83,<br>-0.103*                                    | 3.83,<br>-0.041    | 3.83,<br>-0.035    | 3.84,<br>-0.055         | 3.84,<br>0.1*      | 3.71,<br>-0.155**  | 3.83,<br>-0.151** | 3.8,<br>-0.097*  | 3.83,<br>-0.002   | 1.78,<br>-0.349*** | 1.41,<br>-0.441*** | 3.02,<br>-0.173***               | 3.83,<br>0.108**       | 3.72,<br>-0.164***       | 3.83,<br>-0.017    | 3.84,<br>0          | 3.84,<br>0.116**    |
| Education level                                     | Primary            | 2.73,<br>0.013     | 2.7,<br>0.14***    | 2.73,<br>0.244***   | 2.73,<br>-0.017    | 2.73,<br>0.011     | 2.73,<br>0.172***                                   | 2.72,<br>0.015     | 2.73,<br>-0.013    | 2.7,<br>0.233***        | 2.72,<br>-0.229*** | 2.72,<br>-0.04     | 2.69,<br>0.353*** | 2.72,<br>0.098*  | 2.7,<br>-0.013    | 2.1,<br>-0.158***  | 2.02,<br>-0.202*** | 2.15,<br>-0.173***               | 2.48,<br>-0.236***     | 2.66,<br>0.455***        | 2.73,<br>-0.057    | 2.72,<br>-0.187***  | 2.72,<br>-0.142***  |

|                                       | educati<br>on or<br>below      |                 |                   |                    |                 |                 |                 |                 |                 |                 |                  |                 |                   |                  |                 |                   |                    |                   |                    |                    |                    |                    |                    |                    |
|---------------------------------------|--------------------------------|-----------------|-------------------|--------------------|-----------------|-----------------|-----------------|-----------------|-----------------|-----------------|------------------|-----------------|-------------------|------------------|-----------------|-------------------|--------------------|-------------------|--------------------|--------------------|--------------------|--------------------|--------------------|--------------------|
|                                       | Second<br>ary<br>educati<br>on | 1.33,<br>0.035  | 1.34,<br>0.001    | 1.33,<br>0.045     | 1.33,<br>-0.033 | 1.33,<br>-0.014 | 1.33,<br>-0.015 | 1.34,<br>-0.017 | 1.34,<br>-0.002 | 1.34,<br>-0.02  | 1.33,<br>0.033   | 1.34,<br>0.024  | 1.34,<br>-0.065   | 1.34,<br>0.022   | 1.33,<br>-0.073 | 1.31,<br>-0.114** | 1.34,<br>0.039     | 1.33,<br>0.108**  | 1.21,<br>-0.236*** |                    | 1.25,<br>0.032     | 1.25,<br>0.224***  | 1.3,<br>-0.075     | 1.32,<br>-0.132*** |
| Monthly <HKD1<br>househol<br>d income | 0,000                          | 4.22,<br>-0.05  | 4.15,<br>0.188*** | 4.22,<br>0.094*    | 4.17,<br>-0.018 | 4.18,<br>0.103* | 4.2,<br>0.051   | 4.23,<br>0.031  | 4.22,<br>0.052  | 4.22,<br>0.057  | 4.22,<br>-0.106* | 4.2,<br>-0.053  | 4.22,<br>0.232*** | 4.17,<br>0.133** | 4.17,<br>0.035  | 4.2,<br>-0.115**  | 4.17,<br>-0.157*** | 4.1,<br>-0.164*** | 4.12,<br>0.455***  | 3.97,<br>0.032     |                    | 1.7,<br>-0.33***   | 2.27,<br>-0.231*** | 2.59,<br>-0.175*** |
|                                       | HKD10<br>,000-<br>30,000       | 5.43,<br>0.035  | 5.37,<br>0.037    | 5.38,<br>0.173***  | 5.37,<br>-0.009 | 5.41,<br>0.028  | 5.41,<br>0.096* | 5.43,<br>-0.04  | 5.42,<br>0.02   | 5.43,<br>0.098* | 5.42,<br>0       | 5.43,<br>0.075  | 5.41,<br>0.046    | 5.39,<br>0.056   | 5.42,<br>-0.017 | 5.43,<br>0.043    | 5.43,<br>0.037     | 5.42,<br>-0.017   | 5.43,<br>-0.057    | 5.07,<br>0.224***  | 2.18,<br>-0.33***  |                    | 1.73,<br>-0.437*** | 2.36,<br>-0.331*** |
|                                       | HKD30<br>,001-<br>50,000       | 3.8,<br>-0.004  | 3.76,<br>-0.062   | 3.77,<br>-0.078*   | 3.73,<br>0.123* | 3.79,<br>-0.062 | 3.78,<br>-0.049 | 3.79,<br>0.043  | 3.79,<br>-0.016 | 3.8,<br>-0.046  | 3.8,<br>0.049    | 3.79,<br>-0.01  | 3.79,<br>-0.074   | 3.78,<br>-0.041  | 3.79,<br>-0.03  | 3.75,<br>0.096*   | 3.79,<br>0.062     | 3.8,<br>0         | 3.79,<br>-0.187*** | 3.7,<br>-0.075     | 2.03,<br>-0.231*** | 1.21,<br>-0.437*** |                    | 1.82,<br>-0.232*** |
|                                       | HKD50<br>,001-<br>80,000       | 2.77,<br>-0.016 | 2.78,<br>-0.085*  | 2.78,<br>-0.149*** | 2.76,<br>-0.012 | 2.78,<br>-0.06  | 2.78,<br>-0.084 | 2.77,<br>0.046  | 2.78,<br>-0.072 | 2.78,<br>-0.092 | 2.78,<br>0.089   | 2.78,<br>-0.074 | 2.78,<br>-0.121*  | 2.78,<br>-0.103* | 2.77,<br>0.044  | 2.78,<br>-0.03    | 2.78,<br>0.074     | 2.78,<br>0.116**  | 2.77,<br>-0.142*** | 2.76,<br>-0.132*** | 1.7,<br>-0.175***  | 1.21,<br>-0.331*** | 1.33,<br>-0.232*** |                    |

Note: \*\*\*p<0.001; \*\*p<0.01; \*p>0.05

Multicollinearity diagnostics for adjusted logistic regression for dichotomised average hours of sleep per day regressed against fitted variables.

| VIF,<br>r                         |                                             | Mental and emotional health |                    |                    | Physical reaction to bites                  |                 |                    | Age                |                    |                                  | Education level        |                    | Monthly household income |                      |                      |
|-----------------------------------|---------------------------------------------|-----------------------------|--------------------|--------------------|---------------------------------------------|-----------------|--------------------|--------------------|--------------------|----------------------------------|------------------------|--------------------|--------------------------|----------------------|----------------------|
|                                   |                                             | Slight                      | Moderate           | Severe             | Difficulties<br>sleeping or<br>restlessness | Female          | 0-24               | 25-44              | 45-64              | Primary<br>education or<br>below | Secondary<br>education | <HKD10,000         | HKD10,000-<br>30,000     | HKD30,001-<br>50,000 | HKD50,001-<br>80,000 |
| Mental and<br>emotional<br>health | Slight                                      |                             | 1.17,<br>-0.3***   | 1.14,<br>-0.291*** | 1.44,<br>-0.185***                          | 1.45,<br>-0.057 | 1.45,<br>-0.008    | 1.45,<br>0.06      | 1.45,<br>0.041     | 1.44,<br>-0.093                  | 1.45,<br>0.134**       | 1.45,<br>-0.146**  | 1.43,<br>0.076           | 1.43,<br>0.06        | 1.45,<br>-0.011      |
|                                   | Moderate                                    | 1.4,<br>-0.3***             |                    | 1.2,<br>-0.358***  | 1.57,<br>0.166***                           | 1.75,<br>0.044  | 1.74,<br>0.025     | 1.73,<br>-0.048    | 1.74,<br>-0.017    | 1.74,<br>0.13**                  | 1.74,<br>-0.159**      | 1.71,<br>0.226***  | 1.72,<br>-0.204***       | 1.72,<br>0.009       | 1.72,<br>0.069       |
|                                   | Severe                                      | 1.62,<br>-0.291***          | 1.42,<br>-0.358*** |                    | 1.7,<br>0.391***                            | 2.06,<br>-0.016 | 2.05,<br>-0.072    | 2.06,<br>0.057     | 2.04,<br>-0.161*** | 2.04,<br>0.136**                 | 2.06,<br>-0.011        | 2.05,<br>-0.005    | 1.98,<br>0.237***        | 2,<br>-0.066         | 2.04,<br>-0.168***   |
| Physical<br>reaction to<br>bites  | Difficulties<br>sleeping or<br>restlessness | 1.49,<br>-0.185***          | 1.36,<br>0.166***  | 1.25,<br>0.391***  |                                             | 1.51,<br>-0.025 | 1.5,<br>-0.067     | 1.49,<br>-0.107*   | 1.51,<br>-0.11*    | 1.51,<br>0.299***                | 1.5,<br>-0.123*        | 1.49,<br>0.242***  | 1.5,<br>0.088            | 1.51,<br>-0.108*     | 1.51,<br>-0.193***   |
|                                   | Female                                      | 1.04,<br>-0.057             | 1.04,<br>0.044     | 1.04,<br>-0.016    | 1.04,<br>-0.025                             |                 | 1.04,<br>0.054     | 1.04,<br>-0.055    | 1.04,<br>-0.002    | 1.03,<br>-0.013                  | 1.03,<br>-0.073        | 1.02,<br>0.035     | 1.03,<br>-0.017          | 1.04,<br>-0.03       | 1.04,<br>0.044       |
| Age                               | 0-24                                        | 2.7,<br>-0.008              | 2.69,<br>0.025     | 2.68,<br>-0.072    | 2.68,<br>-0.067                             | 2.69,<br>0.054  |                    | 1.3,<br>-0.331***  | 1.3,<br>-0.349***  | 2.07,<br>-0.158***               | 2.64,<br>-0.114**      | 2.68,<br>-0.115**  | 2.69,<br>0.043           | 2.65,<br>0.096*      | 2.69,<br>-0.03       |
|                                   | 25-44                                       | 3.24,<br>0.06               | 3.23,<br>-0.048    | 3.25,<br>0.057     | 3.21,<br>-0.107*                            | 3.25,<br>-0.055 | 1.56,<br>-0.331*** |                    | 1.27,<br>-0.441*** | 2.42,<br>-0.202***               | 3.25,<br>0.039         | 3.2,<br>-0.157***  | 3.25,<br>0.037           | 3.23,<br>0.062       | 3.24,<br>0.074       |
|                                   | 45-64                                       | 3.32,<br>0.041              | 3.32,<br>-0.017    | 3.29,<br>-0.161*** | 3.31,<br>-0.11*                             | 3.32,<br>-0.002 | 1.6,<br>-0.349***  | 1.3,<br>-0.441***  |                    | 2.62,<br>-0.173***               | 3.32,<br>0.108**       | 3.2,<br>-0.164***  | 3.31,<br>-0.017          | 3.32,<br>0           | 3.32,<br>0.116**     |
| Education<br>level                | Primary<br>education or<br>below            | 2.41,<br>-0.093             | 2.41,<br>0.13**    | 2.41,<br>0.136**   | 2.42,<br>0.299***                           | 2.41,<br>-0.013 | 1.87,<br>-0.158*** | 1.81,<br>-0.202*** | 1.92,<br>-0.173*** |                                  | 2.21,<br>-0.236***     | 2.35,<br>0.455***  | 2.43,<br>-0.057          | 2.42,<br>-0.187***   | 2.42,<br>-0.142***   |
|                                   | Secondary<br>education                      | 1.35,<br>0.134**            | 1.35,<br>-0.159**  | 1.36,<br>-0.011    | 1.35,<br>-0.123*                            | 1.35,<br>-0.073 | 1.33,<br>-0.114**  | 1.36,<br>0.039     | 1.36,<br>0.108**   | 1.24,<br>-0.236***               |                        | 1.26,<br>0.032     | 1.26,<br>0.224***        | 1.32,<br>-0.075      | 1.34,<br>-0.132***   |
| Monthly<br>household<br>income    | <HKD10,000                                  | 3.96,<br>-0.146**           | 3.87,<br>0.226***  | 3.94,<br>-0.005    | 3.91,<br>0.242***                           | 3.89,<br>0.035  | 3.93,<br>-0.115**  | 3.9,<br>-0.157***  | 3.82,<br>-0.164*** | 3.84,<br>0.455***                | 3.68,<br>0.032         |                    | 1.71,<br>-0.33***        | 2.21,<br>-0.231***   | 2.47,<br>-0.175***   |
|                                   | HKD10,000-<br>30,000                        | 5.15,<br>0.076              | 5.16,<br>-0.204*** | 5.02,<br>0.237***  | 5.19,<br>0.088                              | 5.2,<br>-0.017  | 5.21,<br>0.043     | 5.23,<br>0.037     | 5.21,<br>-0.017    | 5.22,<br>-0.057                  | 4.84,<br>0.224***      | 2.26,<br>-0.33***  |                          | 1.72,<br>-0.437***   | 2.34,<br>-0.331***   |
|                                   | HKD30,001-<br>50,000                        | 3.58,<br>0.06               | 3.57,<br>0.009     | 3.53,<br>-0.066    | 3.62,<br>-0.108*                            | 3.62,<br>-0.03  | 3.57,<br>0.096*    | 3.61,<br>0.062     | 3.62,<br>0         | 3.62,<br>-0.187***               | 3.53,<br>-0.075        | 2.02,<br>-0.231*** | 1.2,<br>-0.437***        |                      | 1.77,<br>-0.232***   |
|                                   | HKD50,001-<br>80,000                        | 2.69,<br>-0.011             | 2.66,<br>0.069     | 2.67,<br>-0.168*** | 2.7,<br>-0.193***                           | 2.69,<br>0.044  | 2.69,<br>-0.03     | 2.69,<br>0.074     | 2.7,<br>0.116**    | 2.69,<br>-0.142***               | 2.68,<br>-0.132***     | 1.69,<br>-0.175*** | 1.21,<br>-0.331***       | 1.32,<br>-0.232***   |                      |

Note: \*\*\*p<0.001; \*\*p<0.01; \*p>0.05
